# Supplementary material for: Treatment With Adjuvant Abemaciclib Plus Endocrine Therapy in Patients With High-risk Early Breast Cancer Who Received Neoadjuvant Chemotherapy: A Prespecified Analysis of the monarchE Randomized Clinical Trial
Source: PubMed Central journal article supplement — JAMA Oncol. 2022 Jun 2;8(8):1190–4. doi: 10.1001/jamaoncol.2022.1488 (PMC9164117; doi:10.1001/jamaoncol.2022.1488), 2022-06-02
Supplement: jamaoncol-e221488-s003.pdf [file jamaoncol-e221488-s003.pdf]

## Supplemental Online Content

Martin M, Hegg R, Kim S-B, et al. Treatment with adjuvant abemaciclib plus endocrine therapy in patients with high-risk early breast cancer who received neoadjuvant chemotherapy: a prespecified analysis of the monarchE randomized clinical trial. *JAMA Oncol*. Published online June 2, 2022. doi:10.1001/jamaoncol.2022.1488

**eFigure 1.** CONSORT Diagram in the ITT population

**eTable 1.** Patient Demographics and Disease Characteristics

**eTable 2.** Tumor characteristics and demographics by treatment arm in patients that received NAC

**eTable 3.** TEAEs in patients who received NAC

This supplemental material has been provided by the authors to give readers additional information about their work.

eFigure 1 – CONSORT Diagram in the ITT population

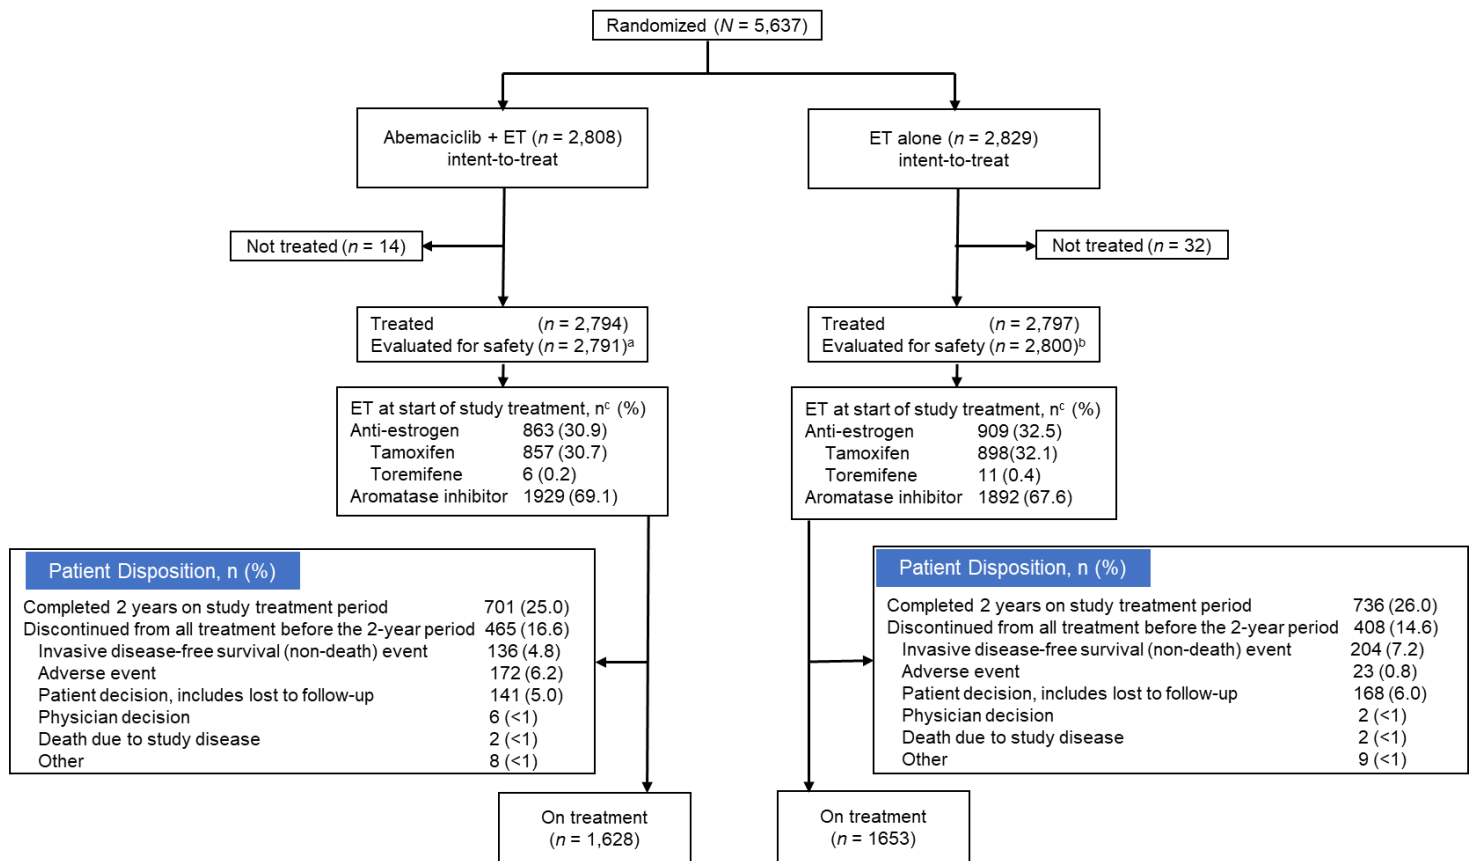

Other: non-compliance (0.3, 0), protocol deviation (0, 0.2), and study terminated (0, 0.1) in the abemaciclib+ET and ET alone arm, respectively  
 At the time of data cut-off 2020-07-08

ET, endocrine therapy; N, number of patients in the safety population; n, number of patients within category.

<sup>a</sup> Four patients randomly assigned to the abemaciclib arm only received ET and were evaluated for safety in the control arm;

<sup>b</sup> One patient randomly assigned to the control arm received abemaciclib and was evaluated for safety in the abemaciclib arm;

<sup>c</sup> A total of 1 patient in each arm double counted as having received both tamoxifen and aromatase inhibitor as first ET due to data entry error

For ovarian suppression detail, please see Table 1 in Johnson et al.<sup>8</sup>

|                                    |                                | Neoadjuvant Chemotherapy  |                                   |                        |
|------------------------------------|--------------------------------|---------------------------|-----------------------------------|------------------------|
|                                    |                                | Yes                       | No <sup>a</sup>                   |                        |
|                                    |                                | Patients treated with NAC | Patients treated with Adjuvant CT | Patients with no chemo |
|                                    |                                | N=2056                    | N=3264                            | N=317                  |
| Age, years                         | Median (range)                 | 49 (22-84)                | 52 (23-88)                        | 64 (24-89)             |
| Menopausal status                  | Premenopausal                  | 1028 (50.1%)              | 1363 (41.8%)                      | 63 (19.9%)             |
|                                    | Postmenopausal                 | 1025 (49.9%)              | 1901 (58.2%)                      | 254 (80.1%)            |
| Radiologic tumor size at diagnosis | <2 cm                          | 337 (16.4%)               | 1120 (34.3%)                      | 108 (34.4%)            |
|                                    | 2-5 cm                         | 1044 (50.8%)              | 1663 (50.9%)                      | 161 (50.8%)            |
|                                    | ≥5 cm                          | 599 (29.1%)               | 343 (10.5%)                       | 39 (12.3%)             |
| Histological grade*                | Grade 1                        | 127 (6.2%)                | 252 (7.7%)                        | 46 (14.5%)             |
|                                    | Grade 2                        | 1015 (49.4%)              | 1591 (48.7%)                      | 166 (52.4%)            |
|                                    | Grade 3                        | 754 (36.7%)               | 1306 (40.0%)                      | 90 (28.4%)             |
| Pretreatment Central Ki-67         | <20%                           | 490 (23.8%)               | 1314 (40.3%)                      | 123 (38.8%)            |
|                                    | ≥20%                           | 902 (43.9%)               | 1459 (44.7%)                      | 137 (43.2%)            |
|                                    | Unavailable                    | 658 (32.0%)               | 491 (15.0%)                       | 57 (18.0%)             |
| Chemotherapy <sup>b</sup>          | Anthracycline/taxane           | 1917 (93.2%)              | 2855 (87.5%)                      | N/A                    |
|                                    | Anthracycline (without taxane) | 71 (3.5%)                 | 144 (4.4%)                        |                        |
|                                    | Taxane (without anthracycline) | 64 (3.1%)                 | 243 (7.4%)                        |                        |
|                                    | Other <sup>c</sup>             | 4 (0.2%)                  | 22 (0.7%)                         |                        |
| Type of surgery                    | BCS <sup>d</sup>               | 497 (24.2%)               | 1046 (32.0%)                      | 90 (28.4%)             |
|                                    | Mastectomy                     | 1557 (75.7%)              | 2217 (67.9%)                      | 226 (71.3%)            |
| Pathologic tumor size at surgery   | <2 cm                          | 739 (35.9%)               | 734 (22.5%)                       | 75 (23.7%)             |
|                                    | 2-5 cm                         | 804 (39.1%)               | 1830 (56.1%)                      | 157 (49.5%)            |
|                                    | ≥5 cm                          | 455 (22.1%)               | 681 (20.9%)                       | 81 (25.6%)             |
|                                    | 0 <sup>e</sup>                 | 9 (0.4%)                  | 4 (0.1%)                          | 1 (0.3%)               |
|                                    | 1 to 3                         | 913 (44.4%)               | 1170 (35.8%)                      | 177 (55.8%)            |

|                                                                                                |            |              |              |             |
|------------------------------------------------------------------------------------------------|------------|--------------|--------------|-------------|
| Number of positive lymph nodes that qualified the patient for enrolment (diagnosis or surgery) | ≥4 or more | 1134 (55.2%) | 2090 (64.0%) | 138 (43.5%) |
|------------------------------------------------------------------------------------------------|------------|--------------|--------------|-------------|

eTable 1. Patient Demographics and Disease Characteristics

<sup>a</sup>Some patients did not receive chemotherapy; <sup>b</sup>Includes neoadjuvant and adjuvant chemotherapy; <sup>c</sup>Other includes single agent cyclophosphamide as well as other chemotherapy agents; <sup>d</sup>BCS: breast conserving surgery; <sup>e</sup>Patients with 0 positive lymph nodes were inadvertently enrolled  
 © 2022 Martin M et al. *JAMA Oncology*.

eTable 2 - Tumor characteristics and demographics by treatment arm in patients that received NAC

|                                                                                                       |                    | Patients Treated With NAC |            |
|-------------------------------------------------------------------------------------------------------|--------------------|---------------------------|------------|
|                                                                                                       |                    | Abemaciclib + ET          | ET Alone   |
|                                                                                                       |                    | N=1025                    | N=1031     |
| Age (median, range)                                                                                   | Median (range)     | 49 (25-84)                | 49 (22-78) |
| Menopausal status                                                                                     | Premenopausal      | 512 (50.1)                | 516 (50.0) |
|                                                                                                       | Postmenopausal     | 510 (49.9)                | 515 (50.0) |
| Radiologic tumor size at diagnosis                                                                    | <2 cm              | 164 (16.0)                | 173 (16.8) |
|                                                                                                       | 2-5 cm             | 519 (50.6)                | 525 (50.9) |
|                                                                                                       | ≥5 cm              | 306 (29.9)                | 293 (28.4) |
| Number of positive lymph nodes that qualified the patient for enrolment (at diagnosis or at surgery)* | 0 <sup>a</sup>     | 3 (0.3)                   | 6 (0.6)    |
|                                                                                                       | 1 to 3             | 450 (43.9)                | 463 (44.9) |
|                                                                                                       | ≥4 or more         | 572 (55.8)                | 562 (54.5) |
| Histological grade*                                                                                   | Grade 1            | 62 (6.0)                  | 65 (6.3)   |
|                                                                                                       | Grade 2            | 489 (47.7)                | 526 (51.0) |
|                                                                                                       | Grade 3            | 398 (38.8)                | 356 (34.5) |
| Central Ki-67 prior to NAC                                                                            | <20%               | 242 (23.6)                | 248 (24.1) |
|                                                                                                       | ≥20%               | 450 (43.9)                | 452 (43.8) |
|                                                                                                       | Unavailable        | 333 (32.5)                | 331 (32.1) |
| Type of surgery                                                                                       | BCS                | 234 (22.8)                | 263 (25.5) |
|                                                                                                       | Mastectomy         | 789 (77.0)                | 768 (74.5) |
| Residual pathological tumor size at surgery                                                           | <2 cm <sup>a</sup> | 370 (36.1)                | 369 (35.8) |
|                                                                                                       | 2-5 cm             | 394 (38.4)                | 410 (39.8) |
|                                                                                                       | ≥5 cm              | 228 (22.2)                | 227 (22.0) |

<sup>a</sup>Patients with 0 lymph node were inadvertently enrolled

eTable 3. TEAEs in patients who received NAC

|                             | Abemaciclib + ET |            |                | ET alone        |            |                |
|-----------------------------|------------------|------------|----------------|-----------------|------------|----------------|
|                             | N = 1018, n (%)  |            |                | N = 1019, n (%) |            |                |
|                             | Any Grade        | Grade 3    | Grade 4        | Any Grade       | Grade 3    | Grade 4        |
| Any TEAE                    | 996 (97.8)       | 488 (47.9) | 23 (2.3)       | 907 (89.0)      | 132 (13.0) | 10 (1.0)       |
| ≥20% in either arm          |                  |            |                |                 |            |                |
| Diarrhea                    | 840 (82.5)       | 83 (8.2)   | 0 <sup>c</sup> | 83 (8.1)        | 2 (0.2)    | 0              |
| Infection <sup>a</sup>      | 488 (47.9)       | 50 (4.9)   | 2 (0.2)        | 357 (35.0)      | 22 (2.2)   | 0 <sup>d</sup> |
| Neutropenia                 | 461 (45.3)       | 223 (21.9) | 7 (0.7)        | 69 (6.8)        | 9 (0.9)    | 2 (0.2)        |
| Fatigue <sup>b</sup>        | 400 (39.3)       | 29 (2.8)   | N/A            | 176 (17.3)      | 1 (0.1)    | N/A            |
| Abdominal Pain <sup>b</sup> | 377 (37.0)       | 13 (1.3)   | N/A            | 95 (9.3)        | 4 (0.4)    | N/A            |
| Leukopenia                  | 371 (36.4)       | 139 (13.7) | 2 (0.2)        | 72 (7.1)        | 4 (0.4)    | 0              |
| Nausea <sup>b</sup>         | 293 (28.8)       | 5 (0.5)    | N/A            | 85 (8.3)        | 0          | N/A            |
| Arthralgia <sup>b</sup>     | 240 (23.6)       | 4 (0.4)    | N/A            | 325 (31.9)      | 5 (0.5)    | N/A            |
| Anemia                      | 227 (22.3)       | 14 (1.4)   | 0              | 32 (3.1)        | 3 (0.3)    | 0              |
| Hot Flush <sup>b</sup>      | 156 (15.3)       | 2 (0.2)    | N/A            | 231 (22.7)      | 6 (0.6)    | N/A            |

<sup>a</sup>Infection is a composite term that includes all reported preferred terms that are part of the infections and infestations system organ class; <sup>b</sup>Preferred term has a maximum CTCAE Grade of 3; <sup>c</sup>1 Grade 5 event occurred; <sup>d</sup>2 Grade 5 events occurred
